# Supplementary material for: The Global Regulatory Architecture of Transcription during the Caulobacter Cell Cycle
Source: PLoS Genet. 2015 Jan 8;11(1):e1004831. doi: 10.1371/journal.pgen.1004831 (PMC4287350; doi:10.1371/journal.pgen.1004831)
Supplement: S2 Dataset — Comparison of previous biochemically determined TSSs with global 5' RACE. (XLSX) [file pgen.1004831.s012.xlsx]

## Sheet: Summary
Dataset S2
Column fields	Description
CCNA	CCNA # of CDS that corresponds to TSS
gene name	gene name of CDS
strand	Chromosomal strand of TSS
TSS location (biochemical)	Location (in genomic coordinates) of previous biochemically identified TSS (see reference listed below table)
TSS location 5' global RACE	Location (in genomic coordinates) of TSS of the same CDS identified by 5' global RACE
+TAP	Normalized sequencing read in +TAP library
-TAP	Normalized sequencing read in -TAP library
difference (bp)	Number of base-pair differences between TSS identified by 5' global RACE and previous biochemically identified TSS
reference	Reference for previous biochemically identified TSS

## Sheet: Dataset S2
CCNA	gene name	strand	TSS location (biochemical)	TSS location 5' global RACE	+TAP	-TAP	difference (bp)	reference
CCNA_00008	dnaA	+	5482	5481	26562.3	830	1	1
CCNA_00009	alkB	-	7857	7858	4.06457	0.1	1	2
CCNA_00010	dnaK	+	7975	7974	6536.17	1850	1	3
CCNA_00010	dnaK	+	8019	8019	34355.4	7260	0	3
CCNA_00152	hrcA	+	161242	161242	297.948	37	0	4
CCNA_00153	grpE	+	162281	162281	1124.22	28.1	0	4
CCNA_00155	dnaN	+	163342	163343	926.39	508	1	5
CCNA_00155	dnaN	+	163292	163343	926.39	508	51	5
CCNA_00155	dnaN	+	163257					5
CCNA_00159	gyrB	+	166555					5
CCNA_00268	dnaX	+	282130					6
CCNA_00438	cagA	-	445256	445255	79.7765	2	1	7
CCNA_00439	mcpA	+	445495	445497	6248.81	3903	2	8
CCNA_00692	cysC	+	749091	749100	1772.19	451.2	9	8
CCNA_00722	groE	-	780024	780023	7690.51	166.2	1	9
CCNA_00866	xylX	-	945878					10
CCNA_00943	flgK	-	1021597					11
CCNA_00945	flbG	+	1022871					12
CCNA_00948	SciP	+	1026403	1026407	8653.58	19324	4	12
CCNA_00950	fliF	+	1026859	1026854	4.87749	0.1	5	13
CCNA_00956	flhA	+	1032305					14
CCNA_01003	fliO	-	1085142	1085133	163.625	0.1	9	15
CCNA_01004	flgB	+	1085194	1085196	13.0214	3	2	16
CCNA_01059	rsaA	+	1159632	1159633	1048.51	27.1	1	17
CCNA_01129	fliQ	+	1233462	1233463	106.64	31	1	18
CCNA_01527	fljL	+	1635201	1635202	651.248	33.1	1	19
CCNA_01528	fljK	+	1636296	1636299	188.049	5	3	20
CCNA_01530	fljJ	+	1637788					20
CCNA_01637	parC	+	1755846	1755846	37.4458	18	0	20
CCNA_02039	clpX	-	2185324	2185327	620.313	151.1	3	21
CCNA_02039	clpX	-	2185231	2185233	1270.73	296	2	22
CCNA_02041	clpP	-	2186906	2186903	574.723	120	3	22
CCNA_02052	parE	+	2200443	2200444	4.06457	0.1	1	22
CCNA_02141	fliL	-	2300568	2300568	3800.87	899	0	21
CCNA_02142	flgF	+	2300733	2300734	21.1653	0.1	1	22
CCNA_02145	flgH	+	2303104	2303104	11.3956	37	0	23
CCNA_02185	ilvB	+	2335853	2335854	1631.39	342	1	24
CCNA_02328	gcrA	+	2470342	2470342	152.229	138	0	25
CCNA_02547	divK	-	2696372	2696372	2591.18	1182.1	0	26
CCNA_02567	pleC	+	2716614	2716613	27095.6	8583	1	27
CCNA_02623	ftsZ	-	2773218	2773216	690.312	44.2	2	9
CCNA_02624	ftsA	-	2774854	2774920	1536.96	139	66	28
CCNA_02625	ftsQ	-	2775808	2775845	1085.14	533	37	29
CCNA_02664	fliX	-	2818575	2818575	888.146	81	0	29
CCNA_02665	flgI	+	2818732	2818733	1.62583	0.1	1	30
CCNA_03043	pilA	-	3198776	3198774	7692.16	675	2	30
CCNA_03130	ctrA	-	3279769	3279769	2954.25	267	0	31
CCNA_03130	ctrA	-	3279712	3279712	6900.04	2024	0	32
CCNA_03139	ilvD	-	3290344	3290345	52.9133	59	1	9
CCNA_03140	ilvR	+	3290404					9
CCNA_03142	rpoD	-	3294260	3294260	3016.13	6611	0	33
CCNA_03195	rpoH	+	3355552	3355551	199.438	28.2	1	34
CCNA_03404	rcdA	+	3572524	3572525	3795.2	1259	1	37
CCNA_03404	rcdA	+	3572627	3572626	895.469	112.1	1	37
CCNA_03424	tacA	+	3590204	3590205	599.968	195	1	35
CCNA_03713	rpoN	-	3879869	3879862	148.963	59	7	36
CCNA_03879	hemE	-	4042684	4042684	14.6472	0.1	0	9
References
1. Zweiger G, Shapiro L (1994) Expression of Caulobacter dnaA as a function of the cell cycle. J Bacteriol 176: 401-408.						1. Zweiger G, Shapiro L (1994) Expression of Caulobacter dnaA as a function of the cell cycle. J Bacteriol 176: 401-408.						1. Zweiger G, Shapiro L (1994) Expression of Caulobacter dnaA as a function of the cell cycle. J Bacteriol 176: 401-408.
2. Colombi D, Gomes SL (1997) An alkB gene homolog is differentially transcribed during the Caulobacter crescentus cell cycle. J Bacteriol 179: 3139-3145.
3. Gomes SL, Gober JW, Shapiro L (1990) Expression of the Caulobacter heat shock gene dnaK is developmentally controlled during growth at normal temperatures. J Bacteriol 172: 3051-3059.
4. Roberts RC, Toochinda C, Avedissian M, Baldini RL, Gomes SL, et al. (1996) Identification of a Caulobacter crescentus operon encoding hrcA, involved in negatively regulating heat-inducible transcription, and the chaperone gene grpE. J Bacteriol 178: 1829-1841.
5. Roberts RC, Shapiro L (1997) Transcription of genes encoding DNA replication proteins is coincident with cell cycle control of DNA replication in Caulobacter crescentus. J Bacteriol 179: 2319-2330.
6. Winzeler E, Shapiro L (1996) A novel promoter motif for Caulobacter cell cycle-controlled DNA replication genes. J Mol Biol 264: 412-425.
7. Stephens CM, Zweiger G, Shapiro L (1995) Coordinate cell cycle control of a Caulobacter DNA methyltransferase and the flagellar genetic hierarchy. J Bacteriol 177: 1662-1669.
8. Jones SE, Ferguson NL, Alley MR (2001) New members of the ctrA regulon: the major chemotaxis operon in Caulobacter is CtrA dependent. Microbiology 147: 949-958.
9. Malakooti J, Wang SP, Ely B (1995) A consensus promoter sequence for Caulobacter crescentus genes involved in biosynthetic and housekeeping functions. J Bacteriol 177: 4372-4376.
10. Avedissian M, Lessing D, Gober JW, Shapiro L, Gomes SL (1995) Regulation of the Caulobacter crescentus dnaKJ operon. J Bacteriol 177: 3479-3484.
11. Meisenzahl AC, Shapiro L, Jenal U (1997) Isolation and characterization of a xylose-dependent promoter from Caulobacter crescentus. J Bacteriol 179: 592-600.
12. Mullin DA, Newton A (1989) Ntr-like promoters and upstream regulatory sequence ftr are required for transcription of a developmentally regulated Caulobacter crescentus flagellar gene. J Bacteriol 171: 3218-3227.
13. Chen LS, Mullin D, Newton A (1986) Identification, nucleotide sequence, and control of developmentally regulated promoters in the hook operon region of Caulobacter crescentus. Proc Natl Acad Sci U S A 83: 2860-2864.
14. Van Way SM, Newton A, Mullin AH, Mullin DA (1993) Identification of the promoter and a negative regulatory element, ftr4, that is needed for cell cycle timing of fliF operon expression in Caulobacter crescentus. J Bacteriol 175: 367-376.
15. Ramakrishnan G, Zhao JL, Newton A (1991) The cell cycle-regulated flagellar gene flbF of Caulobacter crescentus is homologous to a virulence locus (lcrD) of Yersinia pestis. J Bacteriol 173: 7283-7292.
16. Gober JW, Boyd CH, Jarvis M, Mangan EK, Rizzo MF, et al. (1995) Temporal and spatial regulation of fliP, an early flagellar gene of Caulobacter crescentus that is required for motility and normal cell division. J Bacteriol 177: 3656-3667.
17. Fisher JA, Smit J, Agabian N (1988) Transcriptional analysis of the major surface array gene of Caulobacter crescentus. J Bacteriol 170: 4706-4713.
18. Zhuang WY, Shapiro L (1995) Caulobacter FliQ and FliR membrane proteins, required for flagellar biogenesis and cell division, belong to a family of virulence factor export proteins. J Bacteriol 177: 343-356.
19. Minnich SA, Newton A (1987) Promoter mapping and cell cycle regulation of flagellin gene transcription in Caulobacter crescentus. Proc Natl Acad Sci U S A 84: 1142-1146.
20. Ward DV, Newton A (1999) Cell cycle expression and transcriptional regulation of DNA topoisomerase IV genes in caulobacter. J Bacteriol 181: 3321-3329.
21. Osteras M, Stotz A, Schmid Nuoffer S, Jenal U (1999) Identification and transcriptional control of the genes encoding the Caulobacter crescentus ClpXP protease. J Bacteriol 181: 3039-3050.
22. Yu J, Shapiro L (1992) Early Caulobacter crescentus genes fliL and fliM are required for flagellar gene expression and normal cell division. J Bacteriol 174: 3327-3338.
23. Dingwall A, Garman JD, Shapiro L (1992) Organization and ordered expression of Caulobacter genes encoding flagellar basal body rod and ring proteins. J Mol Biol 228: 1147-1162.
24. Dingwall A, Gober JW, Shapiro L (1990) Identification of a Caulobacter basal body structural gene and a cis-acting site required for activation of transcription. J Bacteriol 172: 6066-6076.
25. Tarleton JC, Malakooti J, Ely B (1994) Regulation of Caulobacter crescentus ilvBN gene expression. J Bacteriol 176: 3765-3774.
26. Holtzendorff J, Hung D, Brende P, Reisenauer A, Viollier PH, et al. (2004) Oscillating global regulators control the genetic circuit driving a bacterial cell cycle. Science 304: 983-987.
27. Hung DY, Shapiro L (2002) A signal transduction protein cues proteolytic events critical to Caulobacter cell cycle progression. Proc Natl Acad Sci U S A 99: 13160-13165.
28. Kelly AJ, Sackett MJ, Din N, Quardokus E, Brun YV (1998) Cell cycle-dependent transcriptional and proteolytic regulation of FtsZ in Caulobacter. Genes Dev 12: 880-893.
29. Sackett MJ, Kelly AJ, Brun YV (1998) Ordered expression of ftsQA and ftsZ during the Caulobacter crescentus cell cycle. Mol Microbiol 28: 421-434.
30. Mohr CD, MacKichan JK, Shapiro L (1998) A membrane-associated protein, FliX, is required for an early step in Caulobacter flagellar assembly. J Bacteriol 180: 2175-2185.
31. Skerker JM, Shapiro L (2000) Identification and cell cycle control of a novel pilus system in Caulobacter crescentus. Embo J 19: 3223-3234.
32. Domian IJ, Reisenauer A, Shapiro L (1999) Feedback control of a master bacterial cell-cycle regulator. Proc Natl Acad Sci U S A 96: 6648-6653.
33. Malakooti J, Ely B (1995) Principal sigma subunit of the Caulobacter crescentus RNA polymerase. J Bacteriol 177: 6854-6860.
34. Reisenauer A, Mohr CD, Shapiro L (1996) Regulation of a heat shock sigma32 homolog in Caulobacter crescentus. J Bacteriol 178: 1919-1927.
35. Marques MV, Gomes SL, Gober JW (1997) A gene coding for a putative sigma 54 activator is developmentally regulated in Caulobacter crescentus. J Bacteriol 179: 5502-5510.
36. Anderson DK, Ohta N, Wu J, Newton A (1995) Regulation of the Caulobacter crescentus rpoN gene and function of the purified sigma 54 in flagellar gene transcription. Mol Gen Genet 246: 697-706.
37. McGrath PT, Lee H, Zhang L, Iniesta AA, Hottes AK, Tan MH, Hillson NJ, Hu P, Shapiro L, McAdams HH (2007) High-throughput identification of transcriptional start sites, conserved promoter motifs and predicted regulons. Nat Biotechnol 25: 584-92.
