# Supplementary material for: The Global Regulatory Architecture of Transcription during the Caulobacter Cell Cycle
Source: PLoS Genet. 2015 Jan 8;11(1):e1004831. doi: 10.1371/journal.pgen.1004831 (PMC4287350; doi:10.1371/journal.pgen.1004831)
Supplement: S8 Dataset — Cell cycle-regulated TSSs with enriched SciP full motif (Fig. 3B). (XLSX) [file pgen.1004831.s018.xlsx]

## Sheet: Summary
Dataset S8
Column fields	Description
TSS location	Location (in genomic coordinates) of TSS
strand	Chromosomal strand of TSS
category	Indicates categorization of TSS (P: primary; A: antisense; N: noncoding; I: internal; IP: primary and internal to upstream CDS; AP: primary and antisense to upstream CDS. (see Figure 1B)
CCNA	CCNA # of CDS that corresponds to TSS
essentiality	essentiality of CDS as determined in [22] (y = yes)
motif location	Location (with respect to TSS) of the 5' nuceotide of motif sequence
p-value	p-value of motif sequence (from MEME output)
motif strand	Chromosomal strand of motif sequence
motif sequence	sequence of motif orientated in the same direction as TSS
annotation	annotation of CDS
0 min	Cell cycle TSS activity (1 = maximum) at time point 0 minutes
20 min	Cell cycle TSS activity (1 = maximum) at time point 20 minutes
40 min	Cell cycle TSS activity (1 = maximum) at time point 40 minutes
60 min	Cell cycle TSS activity (1 = maximum) at time point 60 minutes
80 min	Cell cycle TSS activity (1 = maximum) at time point 80 minutes
100 min	Cell cycle TSS activity (1 = maximum) at time point 100 minutes
120 min	Cell cycle TSS activity (1 = maximum) at time point 120 minutes
140 min	Cell cycle TSS activity (1 = maximum) at time point 140 minutes
sciP depletion in glucose vs xylose	microarray (log2 ratio) synchronized strain with sciP depletion under the control of xylose in glucose vs xylose [7]
sciP overexpression vs wild-type	microarray (log2 ratio) sciP overexpression strain vs wild-type [7]

## Sheet: Dataset S8
TSS location	strand	category	CCNA	essentiality	motif location	p-value	motif strand	motif sequence	annotation	0 min	20 min	40 min	60 min	80 min	100 min	120 min	140 min	sciP depletion in glucose vs xylose	sciP overexpression vs wild-type
85007	-	P	CCNA_00081		-82	0.000331	-	GCGACACCGTGTCCG	hypothetical protein	1	0.016905	0.0109768	0.0811154	0.349452	0.648853	0.678523	0.604227	0.570658	-0.0381211
96410	-	P	CCNA_00086		-87	0.000267	-	GCGGGCCTGCGCCGC	NAD-specific glutamate dehydrogenase	0.462307	0.592404	0.166531	0.619451	0.642815	0.86755	1	0.864766	0.178339	0.0225552
370413	+	P	CCNA_00354	y	-66	7.86e-05	+	GCGACGCCTTGCGGC	hypothetical protein	0.2238	0.0361387	0.0571457	0.102602	0.432489	0.525127	1	0.511121	0.149617	-0.0214202
399736	-	P	CCNA_00382	y	-79	0.000684	-	GCGCCTGAAAGGCCG	adenine-specific methyltransferase ccrM	0.00605559	0.00202009	0.0118052	0.0282237	0.269745	0.707792	1	0.495701	-0.0276034	-0.447833
443054	+	P	CCNA_00437		-71	0.000168	+	GCGGCGAGGCGCCGC	methyl-accepting chemotaxis protein	0.0399886	0.0200099	0.0389786	0.0282392	0.300218	1	0.583023	0.1788	0.0565945	-0.0487607
749125	+	P	CCNA_00692		-79	1.23e-05	+	GCGGCGCCATGCCGC	PAS-family GGDEF/EAL protein	0.353927	0.125297	0.0214425	0.0907916	0.296053	0.704931	1	0.591281	0.126405	0.0553792
783796	+	P	CCNA_00728		-68	2.69e-05	+	GCGTCAATCCGACGC	hypothetical protein	0.444009	0.0828203	0.0439993	0.0869362	0.217711	0.644666	1	0.568799	0.256668	-0.0870355
841781	-	P	CCNA_00780		-65	0.000684	-	GCGGGCCATGGGGTC	N-formylglutamate deformylase	0.249632	0.0529004	0	0.0476837	0.286753	0.591886	1	0.492635	-0.0200218	0.053542
1404909	-	P	CCNA_01278		-68	6.69e-06	-	GAGACGTTGGGTCGC	histidine phosphotransferase domain protein	0.505663	0.107207	0.0345318	0.0897574	0.323144	0.704609	1	0.664198	0.541616	-0.373139
1406957	-	P	CCNA_01280		-83	2.58e-06	-	GCGACATCTCGACGC	hypothetical protein	0.0615849	0.0459543	0.138225	0.192272	0.52319	0.704155	1	0.699554	0.116014	-0.0797422
1572588	+	P	CCNA_01465		-66	0.000267	+	GCGACAAAATGCGCG	methyl-accepting chemotaxis protein	0.204924	0.0177285	0.0663061	0.0684536	0.485166	0.538924	1	0.701896	0.135261	-0.0142153
1634209	+	P	CCNA_01525		-75	9.38e-05	+	GCGTCTTACGGTCGC	flagellar biosynthesis repressor flbT	0.551174	0.199399	0.0334165	0.076846	0.347599	1	0.851912	0.611624	0.497923	-0.362002
1856264	-	P	CCNA_01727		-69	9.38e-05	-	TCGGCGATAGGTCGC	methyl-accepting chemotaxis protein	0	0.0339742	0	0.197266	0.655371	0.759594	1	0.38031	0.724521	-0.380045
2072571	+	P	CCNA_01926		-73	7.59e-06	+	GCGGCGCTAAGACGC	two-component response regulator	0.732465	0.110664	0.0655983	0.0813681	0.577719	0.938907	1	0.773782	0.325752	-0.18525
2132225	-	P	CCNA_01985		-87	4.05e-05	-	GCGGCGCTTTGGGGC	ABC transporter ATP-binding protein	0.0426773	0.023728	0.034666	0.0602759	0.320403	0.501832	1	0.122321	-0.0164719	0.0787298
2237616	-	P	CCNA_02087		-88	0.000287	-	GCGCCCTTCGGCCTC	deoxyguanosinetriphosphate triphosphohydrolase	0.741354	0.090837	0.0256858	0.033496	0.127494	0.34498	0.73703	1	0.137631	-0.0243241
2397182	-	P	CCNA_02248		-76	0.000248	-	GCGCGAACTGGGCGC	hypothetical protein	0.604829	0.1325	0.0425684	0.0535886	0.301075	0.669203	1	0.759482
2409363	-	I	CCNA_02257		-91	1.95e-05	-	GCGTCATCGCGCCTC	fliN family protein	0.170239	0.0210675	0.0428229	0.0744583	0.634919	0.535966	1	0.25121	0.496575	-0.219832
3000314	-	P	CCNA_02846		-77	0.000381	-	CCGAAATAGCGCCGC	endopeptidase degP	0.551635	0.158481	0.0330029	0.0900212	0.276859	0.692351	1	0.934246	0.0195371	-0.01844
3193050	-	IP	CCNA_03037		-78	6.55e-05	-	GCGCCCCAACGACGC	pilus assembly ATPase CpaF	0.0184875	0.0308366	0	0.156666	0.532052	1	0.598219	0.397417	0.373993	-0.372447
3198994	+	P	CCNA_03044		-67	8.86e-08	+	GCGACGCTTGGCCGC	CpaC-related secretion pathway protein	0.030798	0.0124282	0.00484196	0.130494	0.406497	1	0.918967	0.409189	0.319424	-0.229384
3413676	+	P	CCNA_03247		-82	5.18e-07	+	GTGACACTATGTCGC	methyl-accepting chemotaxis protein	0.285689	0.0664913	0	0.0563021	0.532052	1	0.845114	0.0685542	0.736113	-0.358031
3498737	-	P	CCNA_03319		-72	0.000467	-	GAGACACTTTGGCCG	hypothetical protein	0.267421	0.391799	0.246576	0.612481	0.651141	0.518426	1	0.820345	-0.0474161	0.120076
3544502	+	P	CCNA_03367		-81	2.02e-07	+	GCGACAATTCGCCCC	chemotaxis receiver domain protein cheYIII	0.0275138	0.035462	0.0487615	0.100681	0.2316	1	0.909828	0.563491	0.0818296	0.0376377
3572550	+	P	CCNA_03404		-85	6.55e-05	+	GCGCTGTTTGGTCGC	regulator of CtrA degradation rcdA	0.22017	0.181458	0.138865	0.257913	0.894536	0.630484	1	0.810716	0.0669206	-0.36503
3720825	-	P	CCNA_03993		-69	0.00023	-	GCGGCCAATCGTGCC	NEW	1	0.22076	0	0	0.613363	0.415016	0.962645	0.657537
3879862	-	P	CCNA_03713		-82	7.18e-05	-	GGGACACACGGTCGC	RNA polymerase sigma-54 factor rpoN	0.0294171	0.00892128	0.0260675	0.152972	0.930259	1	0.913094	0.349528	0.216286	-0.302725
3968733	+	P	CCNA_03803		-70	5.96e-05	+	GCGGCGCAAAGCCTC	cellulose biosynthesis protein CelD	0.357012	0.112936	0	0.031297	0.135556	0.804864	1	0.465763	0.445503	-0.121704
4025268	-	P	CCNA_03863		-77	7.18e-05	-	GCGACCAAACGCCGG	hypothetical protein	0.390006	0.155654	0.163046	0.0979184	0.276498	0.642869	1	0.835729	-0.0198964	-0.0454358
