# Supplementary material for: The Global Regulatory Architecture of Transcription during the Caulobacter Cell Cycle
Source: PLoS Genet. 2015 Jan 8;11(1):e1004831. doi: 10.1371/journal.pgen.1004831 (PMC4287350; doi:10.1371/journal.pgen.1004831)
Supplement: S10 Dataset — Cell cycle-regulated TSSs with DnaA motif. (XLSX) [file pgen.1004831.s020.xlsx]

## Sheet: Summary
Dataset S10
Column fields	Description
TSS location	Location (in genomic coordinates) of TSS
strand	Chromosomal strand of TSS
category	Indicates categorization of TSS (P: primary; A: antisense; N: noncoding; I: internal; IP: primary and internal to upstream CDS; AP: primary and antisense to upstream CDS. (see Figure 1B)
CCNA	CCNA # of CDS that corresponds to TSS
essentiality	essentiality of CDS as determined in [22] (y = yes)
motif location	Location (with respect to TSS) of the 5' nuceotide of motif sequence
p-value	p-value of motif sequence (from FIMO output)
motif strand	Chromosomal strand of motif sequence
motif sequence	sequence of motif orientated in the same direction as TSS
annotation	annotation of CDS
0 min	Cell cycle TSS activity (1 = maximum) at time point 0 minutes
20 min	Cell cycle TSS activity (1 = maximum) at time point 20 minutes
40 min	Cell cycle TSS activity (1 = maximum) at time point 40 minutes
60 min	Cell cycle TSS activity (1 = maximum) at time point 60 minutes
80 min	Cell cycle TSS activity (1 = maximum) at time point 80 minutes
100 min	Cell cycle TSS activity (1 = maximum) at time point 100 minutes
120 min	Cell cycle TSS activity (1 = maximum) at time point 120 minutes
140 min	Cell cycle TSS activity (1 = maximum) at time point 140 minutes

## Sheet: Dataset S10
TSS location	strand	category	CCNA	essentiality	motif location	p-value	motif strand	motif sequence	annotation	0 min	20 min	40 min	60 min	80 min	100 min	120 min	140 min
4034837	-	P	CCNA_03871		-97	0.000172	-	GTCCACA	glucose inhibited division protein A	1	0.592775	0.486942	0.267371	0.304865	0.221572	0.600434	0.411467
4005960	+	I	CCNA_03839		-56	0.000802	-	CTCCACC	acylamino-acid-releasing enzyme	0.0301741	0.563685	1	0.946088	0.437965	0.305135	0.363615	0.238698
3987216	+	N	CCNA_R0199		-51	0.000305	+	ATCAACA	small non-coding RNA	1	0.172946	0.157216	0.317294	0.236414	0.186949	0.262238	0.586449
3971028	+	P	CCNA_03806		-14	0.000225	-	ATCCACC	outer membrane lipoprotein	0.345117	0.644046	0.509125	1	0.615796	0.593258	0.552581	0.295422
3950133	-	P	CCNA_03781	y	-65	0.000933	-	CTCAACA	aconitate hydratase	0.663478	0.867717	0.661417	0.798639	1	0.230505	0.370151	0.518635
3834178	-	P	CCNA_03674		-71	0.000715	+	ATCCAAA	hypothetical protein	0.121257	0.301907	1	0.2454	0.18398	0.0883527	0.0932036	0.140013
3767304	-	P	CCNA_03612		-10	0.000998	-	ATCAACC	transcriptional regulatory protein	0.300204	0.427988	0.721665	0.829371	1	0.589134	0.475288	0.429059
3648686	+	P	CCNA_03487		-1	6.51e-05	-	ATCCACA	hypothetical protein	0.347902	0.126473	0.434761	0.516562	0.721808	1	0.49104	0.593181
3648077	-	P	CCNA_03485		-34	0.000802	+	GTCCACC	membrane protease family, stomatin/prohibitin-like protein	0.794471	1	0.394373	0.607796	0.570686	0.147051	0.344738	0.341568
3486978	-	I	CCNA_03310	y	-74	0.000998	-	ATCAACC	transcription antitermination protein nusG	0.0771947	0.257516	0.885232	0.442521	1	0.421822	0.476266	0.312361
3294538	-	P	CCNA_03142	y	-16	0.000412	-	AGCCACA	RNA polymerase sigma factor rpoD	0.548044	0.699105	0.30695	0.564142	0.655333	1	0.985476	0.875344
3268034	+	P	CCNA_03120		-3, -52	0.000802, 0.000988	-, +	CTCCACC, ATCAACC	chemotaxis protein cheW	1	0.1221	0.0225579	0.0221918	0.121926	0.399026	0.713781	0.444489
3240415	+	P	CCNA_03091		-86	6.51e-05	+	ATCCACA	hypothetical protein	1	0.786175	0.310427	0.175421	0.0159397	0.224691	0.397989	0.251934
3230751	-	P	CCNA_03082		-42	0.000635	-	ATTCACA	hypothetical protein	0.0928346	1	0.640738	0.89373	0.36619	0.30286	0.203379	0.14018
3230740	-	P	CCNA_03082		-53	0.000635	-	ATTCACA	hypothetical protein	0.252416	1	0.623309	0.574536	0.314278	0.178189	0.163445	0.105249
3198994	+	P	CCNA_03044		-41, -24	0.0000651, 0.000933	-, -	ATCCACA, GTCAACA	CpaC-related secretion pathway protein	0.030798	0.0124282	0.00484196	0.130494	0.406497	1	0.918967	0.409189
3131862	-	P	CCNA_02976		-53	6.51e-05	+	ATCCACA	hypothetical protein	1	0.304748	0.0850574	0.0541562	0.18068	0.293437	0.820624	0.729532
3118708	+	P	CCNA_03983		-68	0.000802	-	CTCCACC	NEW	0.364534	0.035592	0.0519989	0.0753445	0.333753	0.585472	1	0.785914
3118694	+	P	CCNA_03983		-54	0.000802	-	CTCCACC	NEW	0.455355	0.178253	0.634072	0.649684	1	0.622858	0.870993	0.447474
3056212	-	P	CCNA_02901		-42	0.000933	+	GTCAACA	methyl-accepting chemotaxis protein	0.00663811	0.00413255	0.0341748	0.204014	1	0.493293	0.903832	0.647963
2998223	-	P	CCNA_02845		-53	0.000998	-	ATCAACC	two-component response regulator	0.0572149	0.190865	0.993397	1	0.366903	0.168195	0.19152	0.295182
2984834	-	P	CCNA_03980		-28	0.000635	-	ATTCACA	NEW	1	0.224865	0.112721	0.293991	0.243703	0.238325	0.42377	0.525965
2944915	-	A	CCNA_02787		-20	0.000305	-	ATCAACA	hypothetical protein	0.0855999	0.467086	0.786698	1	0.930311	0.51478	0.332927	0.302827
2940670	-	N	CCNA_R0172		-29, -100	0.000412, 0.000412	+, -	ACCCACA, AGCCACA	small non-coding RNA	0.24622	0.340608	1	0.759671	0.863129	0.69509	0.826371	0.519205
2899829	+	A	CCNA_03974		-46	0.000802	+	CTCCACC	NEW	0.0188809	0.354293	0.64414	1	0.567	0.732659	0.421345	0.357169
2885832	-	AP	CCNA_02722		-27	0.000998	-	ATCAACC	hypothetical protein	0.881162	0.136721	0.0499363	0.0868273	0.23077	1	0.708816	0.634336
2773216	-	P	CCNA_03971		-63	0.000305	+	ATCAACA	NEW	0.00121655	0.624979	0.432823	1	0.572356	0.243187	0.146601	0.205028
2773187	-	I	CCNA_03971		-92	0.000305	+	ATCAACA	NEW	0	0.27937	0.296838	1	0.171472	0.223808	0.0169897	0.078556
2666045	-	P	CCNA_02515		-13	0.000172	+	GTCCACA	cytosolic protein	0.039784	0.0124003	0.0235025	0.0272433	0.412321	0.49144	0.990944	1
2605028	-	N			-26	0.000172	+	GTCCACA		0.586411	1	0.407713	0.722815	0.474118	0.31536	0.426448	0.338505
2603805	-	IP	CCNA_02460		-31	0.000933	+	GTCAACA	hypothetical protein	0.857187	1	0.393756	0.331886	0.357521	0.414763	0.463928	0.232131
2568784	-	N	CCNA_R0058		-63	0.000305	-	ATCAACA	tRNA-Phe	1	0.605494	0.534104	0.609443	0.222828	0.668482	0.641963	0.553609
2560042	-	N	CCNA_R0163		-70	0.000635	+	ATTCACA	small non-coding RNA	0.0366619	0.630617	0.804056	1	0.581067	0.416731	0.224989	0.409813
2551997	+	P	CCNA_02409		-51	6.51e-05	-	ATCCACA	hybrid sensor histidine kinase/receiver protein	1	0.0971865	0.0922915	0.0246881	0.0200494	0.0787918	0.469721	0.447152
2502371	+	P	CCNA_02363		-54	6.51e-05	-	ATCCACA	hypothetical protein	0.0324891	0.215385	1	0.535037	0.448267	0.154828	0.234744	0.390382
2470342	+	P	CCNA_02328	y	-53, -75	0.000172, 0.00305	-, +	GTCCACA, ATCAACA	gcrA protein	0.096435	0.955786	0.71736	1	0.124476	0.0931039	0.3851	0.298514
2396053	-	P	CCNA_02246	y	-52, -83	0.0000651, 0.000172	+, -	ATCCACA, GTCCACA	division plane positioning ATPase mipZ	0.00315666	0.455438	1	0.785785	0.32191	0.253334	0.149693	0.461431
2361984	-	P	CCNA_02213		-53	0.000225	-	ATCCACC	NADH dehydrogenase	0.570479	1	0.051488	0.089525	0.171846	0	0.176816	0.136259
2351826	-	P	CCNA_02203		-35	0.000412	+	ACCCACA	hypothetical protein	1	0.386967	0.701812	0.542345	0.200202	0.413909	0.214232	0.935527
2304546	+	P	CCNA_02147		-28	0.000933	+	GTCAACA	hypothetical protein	0.79251	0.141164	0.00476847	0.0580384	0.181188	0.442939	1	0.822785
2279218	-	P	CCNA_02125		-82	0.000172	-	CTCCACA	polar development protein podJ	0.0535638	0.497084	1	0.797238	0.561372	0.334798	0.259033	0.348369
2183585	-	P	CCNA_02037		-16	0.000172	-	GTCCACA	ATP-dependent endopeptidase Lon	0.856107	0.979507	1	0.914345	0.602007	0.357745	0.284204	0.19468
2183530	-	P	CCNA_02037		-71	0.000172	-	GTCCACA	ATP-dependent endopeptidase Lon	0.0527611	0.0928929	1	0.360171	0.234732	0.0551474	0.117741	0.231878
2097000	-	P	CCNA_01952	y	-87	0.000412	-	AGCCACA	N-acetylmuramoyl-L-alanine amidase	0.396265	0.0648601	0.0721971	0.0706124	0.370714	0.326607	1	0.681463
1912079	-	P	CCNA_01783	y	-83	6.51e-05	-	ATCCACA	DnaA-related protein	1	0.990865	0.916834	0.545366	0.0743325	0.209563	0.574469	0.357566
1906818	-	P	CCNA_01779		-91	0.000635	+	ATTCACA	hypothetical protein	1	0.0422388	0.00548531	0.00357662	0.0577398	0.0615403	0.236094	0.284523
1664953	+	A	CCNA_01550		-88, -61	0.000172, 0.000998	-, -	GTCCACA, ATCAACC	sulfate adenylyltransferase subunit 2	0.649576	1	0.524572	0.280031	0.288257	0.497373	0.67844	0.399425
1643621	+	P	CCNA_01535	y	-84	0.000172	+	GTCCACA	single-strand DNA binding protein	0.196912	0.736021	1	0.840658	0.473802	0.307194	0.288676	0.519605
1487512	+	P	CCNA_01373		-63	0.000172	+	CTCCACA	hypothetical protein	1	0.907095	0.413025	0.159727	0.269121	0.303075	0.36389	0.41611
1487459	+	P	CCNA_01373		-10	0.000172	+	CTCCACA	hypothetical protein	1	0.947093	0.407786	0.719049	0.324214	0.287226	0.49842	0.33768
1481752	-	P	CCNA_01365		-40	0.000635	-	ATTCACA	aspartyl protease perP	1	0.126174	0	0.0117263	0.175454	0.223461	0.704063	0.437863
1422126	-	P	CCNA_01296		-43	0.000802	+	GTCCACC	hypothetical protein	0.120403	1	0.604957	0.641642	0.242292	0.148878	0.15235	0.0640389
1381514	-	P	CCNA_01252		-88	0.000802	-	GTCCACC	soluble lytic murein transglycosylase	1	0.527231	0.0280098	0.0365267	0	0.00675795	0	0.00988345
1348168	-	IP	CCNA_01221		-93	6.51e-05	+	ATCCACA	acyl carrier protein	0.387562	1	0.168819	0.121383	0.10195	0.117326	0.161405	0.0887916
1269912	+	P	CCNA_01162		-23	0.000802	-	CTCCACC	beta-glucosidase	0.202023	0.483729	0.993888	1	0.724965	0.389948	0.521717	0.593243
1269890	+	P	CCNA_01162		-1	0.000802	-	CTCCACC	beta-glucosidase	0.0331913	0.405149	1	0.709566	0.445516	0.0922506	0.370347	0.389181
1245181	+	I	CCNA_01141		-25	0.000305	+	ATCAACA	RecA protein (RecA has m engineered deletion)	0.0755232	0.51963	0.644137	1	0.189	0.27752	0.358141	0.340933
1188454	-	A	CCNA_01083		-25	0.000412	-	AGCCACA	hypothetical protein	0.973316	1	0.342697	0.721313	0.111137	0.191476	0.280795	0.388227
1176084	+	I	CCNA_R0025		-40	0.000172	-	CTCCACA	small non-coding	0.65336	1	0.506591	0.637035	0.668887	0.340485	0.430782	0.293667
1111621	-	I	CCNA_01024		-10	0.000998	-	ATCAACC	hypothetical protein	1	0.710428	0.842366	0.418479	0.525221	0.0508094	0.440807	0.445852
1084245	-	I	CCNA_01002		-37	0.000802	+	GTCCACC	flagellar biosyntheis protein FliP	0.0307382	0.0113934	0	0.0940624	1	0.915658	0.55638	0.135089
1067818	+	P	CCNA_00987		-72	0.000802	+	CTCCACC	hypothetical protein	0.194833	1	0.837341	0.284787	0.127274	0.149787	0.0924887	0.178302
1034416	-	A	CCNA_00956		-80	0.000802	-	GTCCACC	flagellar biosynthesis protein FlhA	1	0.472591	0.690442	0.282473	0.250253	0.519347	0.297545	0.515919
841804	+	P	CCNA_00781		-2	0.000225	-	ATCCACC	two-component receiver protein cpdR	0.663022	0.0724554	0.111427	0.0774974	0.400505	0.301101	1	0.896442
841781	-	P	CCNA_00780		-21	0.000225	-	ATCCACC	N-formylglutamate deformylase	0.249632	0.0529004	0	0.0476837	0.286753	0.591886	1	0.492635
783796	+	P	CCNA_00728		-30	0.000933	+	CTCAACA	hypothetical protein	0.444009	0.0828203	0.0439993	0.0869362	0.217711	0.644666	1	0.568799
539742	+	P	CCNA_00526		-27	0.000225	+	ATCCACC	hypothetical protein	0.195453	0.210713	0.58084	0.858449	0.763514	0.633432	1	0.31153
492690	+	A	CCNA_00475		-63	0.000477	-	ATCCTCA	bacterial conjugation protein, ATP binding domain trwB	0.496708	0.14122	0.0183395	0.0876916	0.160087	1	0.613006	0.239435
455306	+	IP	CCNA_00451		-97	0.000802	+	GTCCACC	TonB-dependent receptor	0.394695	0.458799	0.265738	0.456883	0.602825	1	0.997025	0.622787
455289	+	I	CCNA_00450		-80	0.000802	+	GTCCACC	cheE protein	0.284877	0.735292	0.456046	1	0.577616	0.489024	0.329466	0.286079
399736	-	P	CCNA_00382	y	-39	0.000933	-	CTCAACA	adenine-specific methyltransferase ccrM	0.00605559	0.00202009	0.0118052	0.0282237	0.269745	0.707792	1	0.495701
389017	-	P	CCNA_00372	y	-13	0.000998	-	ATCAACC	ATP synthase C chain	0.254165	0.53342	0.558109	1	0.559172	0.748814	0.554729	0.417882
373496	+	P	CCNA_00357		-7	0.000305	-	ATCAACA	secretory tripeptidyl aminopeptidase	0.0420541	0.471528	0.637649	0.999825	0.456047	1	0.604794	0.474106
273656	+	P	CCNA_00261	y	-81	6.51e-05	+	ATCCACA	ribonucleoside-diphosphate reductase subunit beta	0.380191	0.568718	1	0.434688	0.317147	0.141924	0.296276	0.228319
5481	+	P	CCNA_00008	y	-73	0.000933	+	GTCAACA	chromosomal replication initiator protein DnaA	0.945766	1	0.50603	0.561021	0.272183	0.235477	0.413853	0.451164
4902	+	P	CCNA_00007	y	-39	0.000172	-	GTCCACA	SSU ribosomal protein S20P	0.821157	0.858495	0.631907	0.58266	0.639107	0.184801	0.832949	1
182	-	N	CCNA_R0094		-45	6.51e-05	+	ATCCACA	small non-coding RNA	0.174781	0.0489506	0.00635694	0.146454	0.57612	1	0.560316	0.377961
