# Supplementary material for: The Global Regulatory Architecture of Transcription during the Caulobacter Cell Cycle
Source: PLoS Genet. 2015 Jan 8;11(1):e1004831. doi: 10.1371/journal.pgen.1004831 (PMC4287350; doi:10.1371/journal.pgen.1004831)
Supplement: S11 Dataset — Cell cycle-regulated TSSs with methyltransferase CcrM methylation motif within (1–50 bp) of upstream promoter regions (Fig. 4). (XLSX) [file pgen.1004831.s021.xlsx]

## Sheet: Summary
Dataset S11
Column fields	Description
TSS location	Location (in genomic coordinates) of TSS with CcrM methylation site (GANTC) in (1-50bp) upstream promoter regions
strand	Chromosomal strand of TSS
category	Indicates categorization of TSS (P: primary; A: antisense; N: noncoding; I: internal; IP: primary and internal to upstream CDS; AP: primary and antisense to upstream CDS. (see Figure 1B)
CCNA	CCNA # of CDS that corresponds to TSS
essentiality	essentiality of CDS as determined in [22] (y = yes)
motif location	Location (with respect to TSS) of the 5' nuceotide of motif sequence
p-value	p-value of motif sequence (from MEME output)
motif strand	Chromosomal strand of motif sequence
motif sequence	sequence of motif orientated in the same direction as TSS
annotation	annotation of CDS
0 min	Cell cycle TSS activity (1 = maximum) at time point 0 minutes
20 min	Cell cycle TSS activity (1 = maximum) at time point 20 minutes
40 min	Cell cycle TSS activity (1 = maximum) at time point 40 minutes
60 min	Cell cycle TSS activity (1 = maximum) at time point 60 minutes
80 min	Cell cycle TSS activity (1 = maximum) at time point 80 minutes
100 min	Cell cycle TSS activity (1 = maximum) at time point 100 minutes
120 min	Cell cycle TSS activity (1 = maximum) at time point 120 minutes
140 min	Cell cycle TSS activity (1 = maximum) at time point 140 minutes
Group	Group (blue, red, or green) of co-expression in which TSS belongs to (Figure 4).

## Sheet: Dataset S11
TSS location	strand	category	CCNA	essentiality	motif location	p-value	motif strand	motif sequence	annotation	0 min	20 min	40 min	60 min	80 min	100 min	120 min	140 min	Group
49062	+	P	CCNA_00045	y	-45	0.0039	+	GAGTCGTC	inorganic pyrophosphatase	0.781803	1	0.478499	0.849327	0.490639	0.331378	0.729646	0.705072	blue
52186	-	P	CCNA_00048	y	-9	0.000533	-	GATTCTGG	S-adenosylmethionine synthetase	0.240282	0.491716	0.839834	1	0.798342	0.633912	0.655056	0.723101	red
85007	-	P	CCNA_00081		-17	0.00286	-	GAGTCTAG	hypothetical protein	1	0.016905	0.0109768	0.0811154	0.349452	0.648853	0.678523	0.604227	blue
160416	-	P	CCNA_00150		-12	0.00033	-	GATTCCGG	PDZ domain family protein	0.22256	0.842386	0.661541	1	0.798719	0.746284	0.551239	0.334372	green
165000	+	P	CCNA_00157		-22	0.00142	+	GAGTCACG	glyoxalase family protein	0.132152	0.484354	1	0.906215	0.469961	0.212646	0.551012	0.508354	red
173670	-	A	CCNA_00163		-20	0.00142	-	GAATCTTG	chain length regulator/tyrosine-protein kinase (capsular polysaccharide biosynthesis)	0.170085	0.141848	0.698059	0.246544	0.761678	1	0.279676	0.0615788	green
294645	+	P	CCNA_00282		-38	0.00317	+	GAGTCGGA	conserved cell surface protein	0.173527	1	0.355201	0.165431	0.130277	0.0918211	0.0348515	0.0656518	red
300837	-	P	CCNA_00289		-44	0.00182	-	GAATCTAT	hypothetical protein	0.0618124	0.393659	0.91746	1	0.745313	0.181711	0.445169	0.526669	red
373496	+	P	CCNA_00357		-40	0.00286	+	GAGTCTTG	secretory tripeptidyl aminopeptidase	0.0420541	0.471528	0.637649	0.999825	0.456047	1	0.604794	0.474106	red
399736	-	P	CCNA_00382	y	-9, -16	0.00142, 0.00182	-, -	GATTCCGC, GACTCATG	adenine-specific methyltransferase ccrM	0.00605559	0.00202009	0.0118052	0.0282237	0.269745	0.707792	1	0.495701	green
400487	-	P	CCNA_00383		-37	0.00182	-	GATTCCCA	ribonuclease HII	0.270833	0.367845	0.452557	1	0.600309	0.618736	0.707995	0.399219	green
445497	+	P	CCNA_00439		-25, -36	0.00182, 0.00142	+, +	GAATCTAT, GAGTCTGT	methyl-accepting chemotaxis protein	0.108299	0.0357039	0.0281351	0.122398	0.601213	0.753649	1	0.551819	green
455289	+	I	CCNA_00450		-17	0.00142	+	GACTCCAT	cheE protein	0.284877	0.735292	0.456046	1	0.577616	0.489024	0.329466	0.286079	green
455306	+	IP	CCNA_00451		-34	0.00142	+	GACTCCAT	TonB-dependent receptor	0.394695	0.458799	0.265738	0.456883	0.602825	1	0.997025	0.622787	blue
483744	+	N			-33	0.00317	+	GATTCCAA		0.800355	1	0.114306	0.453399	0.146733	0.0861833	0.242067	0.73105	blue
486009	+	A	CCNA_00470		-21	0.00142	+	GAATCAGC	O-antigen polymerase	0.13047	1	0.910454	0.775824	0.589936	0.28635	0.548399	0.555832	red
738053	+	P	CCNA_00682		-23, -34	0.00372, 0.00033	+, +	GAGTCAAA, GAATCTGT	transcriptional regulator, MarR family	0.144061	0.166652	0.158541	0.728543	0.476813	1	0.300744	0.255736	green
749172	+	I	CCNA_00692		-18	0.000533	+	GAATCCGA	PAS-family GGDEF/EAL protein	0.483488	0.157354	0.0287363	0.224844	0.41315	0.963718	1	0.689507	blue
749181	+	I	CCNA_00692		-10, -27	0.00142, 0.000533	+	GACTCAAG, GAATCCGA	PAS-family GGDEF/EAL protein	0.29003	0.172186	0.0479159	0.197871	0.172226	1	0.745957	0.152167	blue
754342	-	P	CCNA_00694		-23	0.000533	-	GATTCCCG	ATP-dependent DNA helicase	0.286302	0.37938	1	0.801984	0.290572	0.228178	0.443686	0.4568	red
804886	-	I	CCNA_00747		-32	0.00317	-	GACTCTTC	cyclic-di-GMP phosphodiesterase, flagellum assembly factor TipF	0.104883	1	0.897997	0.972871	0.546227	0.179995	0.506066	0.711728	red
954035	-	IP	CCNA_00875		-35	0.00317	-	GAGTCTTT	Flp/Fap pilin component protein	0.464916	0.0622862	0.0272995	0.039556	0.170548	0.392999	1	0.473615	blue
1002605	-	P	CCNA_00925		-29	0.00317	-	GACTCAAC	hypothetical protein	0.15074	1	0.901629	0.914499	0.720168	0.467301	0.397552	0.577376	red
1081955	+	P	CCNA_00999		-5, -27	0.00346, 0.00346	+, +	GAATCGAA, GATTCGTT	hypothetical protein	0.102666	0.134614	0.16322	0.46292	0.590791	1	0.387156	0.186943	green
1112836	+	A	CCNA_01026		-29	0.000533	+	GAATCCGA	hypothetical protein	0.204543	0.967444	0.909744	1	0.86983	0.596252	0.38783	0.416945	red
1245156	+	P	CCNA_01141		-21	0.00142	+	GAATCATG	RecA protein (RecA has m engineered deletion)	0.0749177	0.468088	1	0.796257	0.68396	0.382959	0.31221	0.702265	red
1245181	+	I	CCNA_01141		-46	0.00142	+	GAATCATG	RecA protein (RecA has m engineered deletion)	0.0755232	0.51963	0.644137	1	0.189	0.27752	0.358141	0.340933	red
1301925	+	P	CCNA_01182		-48	0.00372	+	GAGTCGAT	glutathione S-transferase	0.389183	0.19648	0.355247	0.639748	1	0.56018	0.421177	0.570796	green
1301937	+	P	CCNA_01182		-9	0.000533	+	GATTCAGG	glutathione S-transferase	1	0.553128	0.162874	0.887718	0.688356	0.683158	0.986717	0.96375	blue
1302007	+	I	CCNA_01182		-49	0.00372	+	GAGTCGTT	glutathione S-transferase	0.185807	0.34568	0.522444	0.590463	0.590177	1	0.526282	0.0737392	green
1422126	-	P	CCNA_01296		-29	0.000533	-	GAATCTCT	hypothetical protein	0.120403	1	0.604957	0.641642	0.242292	0.148878	0.15235	0.0640389	red
1442938	+	I	CCNA_01327	y	-21	0.00142	+	GACTCAAG	adenylate kinase/nucleoside-diphosphate kinase	0.123898	0.425746	0.789412	1	0.800102	0.654298	0.667621	0.509981	red
1481752	-	P	CCNA_01365		-41	0.00231	-	GATTCACA	aspartyl protease perP	1	0.126174	0	0.0117263	0.175454	0.223461	0.704063	0.437863	blue
1487459	+	P	CCNA_01373		-33	0.00372	+	GACTCGTC	hypothetical protein	1	0.947093	0.407786	0.719049	0.324214	0.287226	0.49842	0.33768	blue
1534631	+	P	CCNA_01417	y	-20	0.00231	+	GAATCGGC	5-aminolevulinic acid synthase	0.118614	0.811667	0.44172	1	0.853972	0.567918	0.350216	0.138081	green
1544231	-	P	CCNA_01426		-17, -47	0.000924, 0.00182	-, -	GACTCCAG, GACTCTAT	chemotaxis receiver domain protein cheYIII	1	0.0795151	0	0.0563692	0	0.393699	0.242457	0.301238	blue
1548452	+	P	CCNA_01433		-42	0.00317	+	GAGTCTTT	integration host factor alpha-subunit	0.724165	1	0.308987	0.512226	0.317315	0.456096	0.371716	0.477422	blue
1571956	-	P	CCNA_03951		-24	0.00142	-	GAATCTTG	NEW	0.974378	1	0.407549	0.622358	0.331187	0.438636	0.850291	0.43142	blue
1588422	+	IP	CCNA_01480		-22	0.00372	+	GAGTCGCC	hypothetical protein	0.079864	0.320167	0.851092	1	0.744556	0.435189	0.399202	0.523524	red
1634129	+	P	CCNA_01525		-7	0.00346	+	GAGTCCTA	flagellar biosynthesis repressor flbT	0.00376977	0.0314392	0.192914	0.331437	1	0.824501	0.273408	0.0810369	green
1639346	+	P	CCNA_01532		-34	0.0039	+	GAGTCGTC	regulatory protein flaY	1	0.234664	0.0197316	0.12008	0.309017	0.373713	0.754406	0.466485	blue
1733188	+	P	CCNA_01612	y	-21	0.00142	+	GAATCATG	rod shape-determining protein mreB	0.0429111	0.651836	0.448148	1	0.866761	0.56225	0.60192	0.326808	red
1803684	+	IP	CCNA_01677		-47	0.00033	+	GACTCTGT	carboxypeptidase G2 precursor	0.441446	1	0.697778	0.505528	0.895732	0.589236	0.252938	0.112849	green
1812873	-	P	CCNA_01685		-5	0.00033	-	GAATCAGT	hemimethylated DNA-binding protein yccV	0.203405	0.839116	0.703772	1	0.893715	0.452799	0.391546	0.339119	green
1845497	-	AP	CCNA_03956		-42	0.000533	-	GATTCCCG	NEW	0.992643	0.550357	1	0.305457	0.0832665	0.1565	0.383632	0.48637	blue
1923470	+	P	CCNA_01797		-4	0.00033	+	GAATCCCT	septum formation initiator	0.606154	0.0792237	0.0661392	0.124583	0.701858	1	0.847953	0.388962	blue
2056607	-	AP	CCNA_01912		-22	0.000161	-	GAATCAGG	protein ydhR precursor	0.0715753	0.286526	1	0.818833	0.967247	0.297379	0.500477	0.566214	red
2058871	+	A	CCNA_01916		-7	0.00286	+	GATTCGGA	ribonuclease BN	0.164147	0.256678	1	0.456423	0.359434	0.337779	0.297625	0.158786	red
2123909	+	I	CCNA_01979		-6	0.00182	+	GACTCTAT	LexA repressor	0.0858474	0.145427	0.0915237	0.426261	0.50352	1	0.215523	0.198383	green
2183530	-	P	CCNA_02037		-21	0.000161	-	GACTCAGG	ATP-dependent endopeptidase Lon	0.0527611	0.0928929	1	0.360171	0.234732	0.0551474	0.117741	0.231878	red
2213484	-	P	CCNA_02062		-23	0.000533	-	GATTCCCG	DNA repair protein recN	0.154407	0.333903	0.703373	0.839986	1	0.604908	0.49002	0.459019	red
2219445	-	P	CCNA_02067		-28	0.000924	-	GACTCCCA	hypothetical protein	0.152364	0.574135	0.684093	1	0.61035	0.614924	0.608722	0.520447	red
2239175	+	P	CCNA_02091		-21, -28	0.00033, 0.000533	+, +	GACTCCCT, GAATCGGG	hypothetical protein	0.12802	0.225233	1	0.687328	0.491532	0.618643	0.273948	0.265397	red
2250216	-	I	CCNA_02100		-21	0.00142	-	GACTCAGC	hypothetical protein	0.0212259	0.386493	1	0.839398	0.637419	0.703012	0.315783	0.231183	red
2279218	-	P	CCNA_02125		-24	0.000924	-	GAATCGGT	polar development protein podJ	0.0535638	0.497084	1	0.797238	0.561372	0.334798	0.259033	0.348369	red
2300534	-	I	CCNA_02141		-31	0.00317	-	GATTCCAA	flagellar fliL protein	0.0791092	0.0742227	0.0481944	0.418991	0.51968	1	0.353079	0.102034	green
2354232	-	P	CCNA_02205		-18	0.00231	-	GAGTCAGA	hypothetical protein	1	0.547839	0.193149	0.226576	0.119556	0.0995859	0.16113	0.103631	blue
2434068	+	N	CCNA_R0159		-22	0.00286	+	GAATCGCC	small non-coding RNA	0.0400018	0.480399	0.584873	1	0.580615	0.658528	0.714141	0.591614	red
2438331	-	I	CCNA_02290		-30	0.000924	-	GAATCCTG	hypothetical protein	0.0268194	0.192356	0.575124	1	0.64432	0.517199	0.17955	0.193713	red
2475498	+	P	CCNA_02334		-37	0.00142	+	GAGTCTCG	transcriptional regulator of stalk biogenesis staR	1	0.314516	0.160799	0.0267692	0.0151349	0.00946092	0.0180754	0.0503316	blue
2482715	-	P	CCNA_02342		-11	0.00286	-	GAGTCCCC	hypothetical protein	0.998912	0.410486	0.0543954	0.0756646	0.377065	0.779568	0.94895	1	blue
2502371	+	P	CCNA_02363		-22	0.000161	+	GAATCCCG	hypothetical protein	0.0324891	0.215385	1	0.535037	0.448267	0.154828	0.234744	0.390382	red
2546181	-	P	CCNA_02402		-27	0.000533	-	GATTCCGT	methyl-accepting chemotaxis protein	0	0	0.0314115	0.245776	1	0.985227	0.35957	0.199508	green
2560042	-	N	CCNA_R0163		-5	0.000924	-	GATTCACG	small non-coding RNA	0.0366619	0.630617	0.804056	1	0.581067	0.416731	0.224989	0.409813	red
2591894	+	P	CCNA_02452		-33	0.00231	+	GACTCGCA	hypothetical protein	0.00197405	0.0263412	0.365596	0.581314	0.676796	0.712624	1	0.695938	green
2696954	+	IP	CCNA_02549		-22	0.000924	+	GAATCGGT	glucokinase	0.0739265	0.377468	1	0.994029	0.721132	0.509152	0.437683	0.402154	red
2716613	+	P	CCNA_02567		-10	0.000924	+	GATTCACG	sensory transduction histidine kinase pleC	0.225664	0.297208	1	0.598005	0.787808	0.542191	0.448403	0.49638	red
2773216	-	P	CCNA_03971		-22	0.000924	-	GACTCAGA	NEW	0.00121655	0.624979	0.432823	1	0.572356	0.243187	0.146601	0.205028	red
2774920	-	IP	CCNA_02624	y	-22	0.000924	-	GAATCCTG	cell division protein ftsA	0.0419249	0.713475	0.588698	1	0.374918	0.528497	0.189735	0.344363	red
2803550	+	A	CCNA_02649		-34	0.00142	+	GACTCTCA	transcriptional regulator	1	0.656104	0.398359	0.378793	0.147019	0.381446	0.376205	0.448048	blue
2811557	+	AP	CCNA_02659		-22	0.00182	+	GATTCAGA	two-component receiver domain protein	0.248018	0.443725	0.652868	1	0.546415	0.508454	0.502568	0.452774	red
2889874	-	P	CCNA_02726		-23	0.00286	-	GAATCGCC	putative acetyltransferase/acyltransferase	0.301362	0.368975	1	0.529778	0.561616	0.226191	0.271868	0.286697	red
2944915	-	A	CCNA_02787		-22	0.00317	-	GAATCAAC	hypothetical protein	0.0855999	0.467086	0.786698	1	0.930311	0.51478	0.332927	0.302827	red
2998223	-	P	CCNA_02845		-22	0.000533	-	GAATCGGG	two-component response regulator	0.0572149	0.190865	0.993397	1	0.366903	0.168195	0.19152	0.295182	red
3082478	-	P	CCNA_02922		-40	0.00231	-	GATTCAGC	hypothetical protein	0.702283	0.1017	0.0501235	0.0747019	0.227958	0.376621	1	0.611446	blue
3091482	-	N	CCNA_R0176		-45	0.000533	-	GATTCCGT	small non-coding RNA	1	0.178499	0.0346266	0.0169333	0.0111125	0.0438607	0.103058	0.0717823	blue
3153160	+	P	CCNA_03904		-30	0.00142	+	GACTCCAT	NEW	0.00149374	0.0274066	0.567843	1	0.624267	0.778112	0.676682	0.575415	green
3156442	+	P	CCNA_03003		-23	0.00142	+	GACTCGCT	two component sensor histidine kinase	0.16172	0.225068	1	0.55032	0.538768	0.254345	0.297737	0.302449	red
3188051	+	P	CCNA_03033		-33	0.00231	+	GATTCCTT	tetratricopeptide repeat family protein	0.0165025	0	0.0631937	0.239734	1	0.569676	0.573446	0.206767	green
3240415	+	P	CCNA_03091		-19, -32, -49	0.00346, 0.000924, 0.000533	+, +, +	GAGTCCTA, GAATCGCG, GACTCTCT	hypothetical protein	1	0.786175	0.310427	0.175421	0.0159397	0.224691	0.397989	0.251934	blue
3267310	-	P	CCNA_03118		-33, -38	0.000924, 0.00372	-, -	GACTCGCG, GACTCGAC	hypothetical protein	0.379615	0.254702	0.36168	0.550265	1	0.476589	0.382171	0.647925	green
3279769	-	P	CCNA_03130	y	-29	0.00317	-	GATTCGCA	cell cycle response regulator ctrA	0.00208053	0.126014	0.0874568	1	0.311094	0.42538	0.268709	0.122097	red
3282792	+	P	CCNA_03135		-13	0.000924	+	GAGTCTGG	flagellum-specific ATP synthase fliL	0.00647943	0.00135094	0.0210526	0.21048	0.69319	1	0.554277	0.232142	green
3284112	+	IP	CCNA_03136		-12	0.00182	+	GACTCTTT	flagellar export protein FliJ	0.570479	0.0819301	0	0.0547697	0.556391	0.267515	1	0.764697	blue
3294538	-	P	CCNA_03142	y	-5	0.00142	-	GACTCAAG	RNA polymerase sigma factor rpoD	0.548044	0.699105	0.30695	0.564142	0.655333	1	0.985476	0.875344	blue
3498737	-	P	CCNA_03319		-33, -48	0.00182, 0.00182	-, -	GACTCTCC, GACTCTCC	hypothetical protein	0.267421	0.391799	0.246576	0.612481	0.651141	0.518426	1	0.820345	blue
3547570	-	P	CCNA_03372		-42	0.00142	-	GAGTCAGT	bacterioferritin-associated ferredoxin	0.00579796	0.115765	0.586759	1	0.78693	0.762782	0.990948	0.966588	green
3578625	-	P	CCNA_03410		-41	0.00286	-	GATTCACC	peptidoglycan-specific endopeptidase, M23 family	0.325659	0.0598322	0.0219677	0.0461542	0.348738	0.51235	1	0.618825	blue
3615969	-	N			-23	0.00231	-	GAGTCCGC		0.375739	0.144245	0.348808	0.492775	1	0.448837	0.372663	0.307698	green
3695759	+	P	CCNA_03537		-34	0.00142	+	GACTCTGC	glyoxalase family protein	0.154802	0.138161	0.529445	0.759474	0.774794	0.699374	1	0.873377	green
3750260	+	P	CCNA_03598	y	-4	0.00182	+	GATTCTGA	two-component sensor histidine kinase divL	0.0786701	0.196829	0.383415	1	0.516796	0.335337	0.899742	0.304404	green
3869142	-	P	CCNA_03700		-28	0.00231	-	GAGTCGCG	large-conductance mechanosensitive channel	0.11034	0.201254	1	0.884688	0.905015	0.451529	0.421471	0.589633	red
3937043	-	P	CCNA_03768	y	-34	0.00231	-	GACTCCTA	signal recognition particle GTPase, SRP	0.740927	0.500594	0.548516	0.437129	0.117354	0.264682	0.606961	1	blue
3976506	-	N			-44	0.00033	-	GAATCTGT		0	0.727063	0.42254	1	0.253125	0.0453097	0.204223	0.165663	red
4005960	+	I	CCNA_03839		-22	0.00286	+	GATTCACC	acylamino-acid-releasing enzyme	0.0301741	0.563685	1	0.946088	0.437965	0.305135	0.363615	0.238698	red
4034837	-	P	CCNA_03871		-6, -45	0.00286, 0.00231	-, -	GAGTCCAG, GAGTCACA	glucose inhibited division protein A	1	0.592775	0.486942	0.267371	0.304865	0.221572	0.600434	0.411467	blue
