# Supplementary material for: The Global Regulatory Architecture of Transcription during the Caulobacter Cell Cycle
Source: PLoS Genet. 2015 Jan 8;11(1):e1004831. doi: 10.1371/journal.pgen.1004831 (PMC4287350; doi:10.1371/journal.pgen.1004831)
Supplement: S15 Dataset — Cell cycle-regulated TSSs with enriched RpoN motif (S5 Fig.). (XLSX) [file pgen.1004831.s025.xlsx]

## Sheet: Summary
Dataset S15
Column fields	Description
TSS location	Location (in genomic coordinates) of TSS
strand	Chromosomal strand of TSS
category	Indicates categorization of TSS (P: primary; A: antisense; N: noncoding; I: internal; IP: primary and internal to upstream CDS; AP: primary and antisense to upstream CDS. (see Figure 1B)
CCNA	CCNA # of CDS that corresponds to TSS
motif location	Location (with respect to TSS) of the 5' nuceotide of motif sequence
p-value	p-value of motif sequence (from MEME output)
motif strand	Chromosomal strand of motif sequence
motif sequence	sequence of motif orientated in the same direction as TSS
annotation	annotation of CDS
0 min	Cell cycle TSS activity (1 = maximum) at time point 0 minutes
20 min	Cell cycle TSS activity (1 = maximum) at time point 20 minutes
40 min	Cell cycle TSS activity (1 = maximum) at time point 40 minutes
60 min	Cell cycle TSS activity (1 = maximum) at time point 60 minutes
80 min	Cell cycle TSS activity (1 = maximum) at time point 80 minutes
100 min	Cell cycle TSS activity (1 = maximum) at time point 100 minutes
120 min	Cell cycle TSS activity (1 = maximum) at time point 120 minutes
140 min	Cell cycle TSS activity (1 = maximum) at time point 140 minutes
Group	Group (red or green) of co-expression in which TSS belongs to (Figure S4).

## Sheet: Dataset S15
TSS location	strand	category	CCNA	motif location	p-value	motif strand	motif sequence	annotation	0 min	20 min	40 min	60 min	80 min	100 min	120 min	140 min	Group
3387038	-	P	CCNA_03224	-26	5.48e-05	-	GGCGCGGCTCATGC	hypothetical protein	1	0.174328	0.0461458	0.0185161	0	0	0.00812669	0.0463435	green
3267310	-	P	CCNA_03118	-40	0.00364	-	AGGACTCGACTCGC	hypothetical protein	0.379615	0.254702	0.36168	0.550265	1	0.476589	0.382171	0.647925	red
3189129	-	P	CCNA_03034	-26	4.6e-06	-	GGCGTAGGTCTTGC	hypothetical protein	1	0.433085	0.218018	0.0475884	0.0189126	0.00628016	0.027693	0.131047	green
3091871	-	P	CCNA_02931	-33	0.00272	-	GGGCTTAACCCAAC	flgE-related flagellar hook protein	1	0.111347	0.019652	0.00379668	0	0.0363512	0.183966	0.244244	green
2848052	-	P	CCNA_02693	-26	3.3e-06	-	GGCCCGCGACTTGC	iron-regulated protein frpC	1	0.343299	0.229445	0.0641524	0.0145048	0.00500729	0.0393312	0.148701	green
2848045	-	P	CCNA_02693	-33	3.3e-06	-	GGCCCGCGACTTGC	iron-regulated protein frpC	0.625913	1	0.210776	0.0741937	0.00882298	0.0182411	0.0550741	0.160874	green
2818575	-	P	CCNA_02664	-43	0.000108	-	GGCATTAACCATAC	flagellar assembly regulator fliX	0.0778516	0.0606164	0.321174	0.405145	1	0.814783	0.629332	0.40776	red
2407216	-	P	CCNA_02255	-26	1.06e-06	-	GGCGCCGACCTTGC	lysozyme-family localization factor spmX	1	0.478767	0.0752114	0.00653871	0.00772385	0	0	0.0477701	green
2300568	-	P	CCNA_02141	-33	0.000416	-	ATCGTTAACCATGC	flagellar fliL protein	0.0233681	0.00779546	0.0248486	0.245732	1	0.686705	0.603023	0.39931	red
1381514	-	P	CCNA_01252	-26	0.000108	-	GGACCATGACTTGC	soluble lytic murein transglycosylase	1	0.527231	0.0280098	0.0365267	0	0.00675795	0	0.00988345	green
1348168	-	IP	CCNA_01221	-19	4.92e-05	-	GGACCCCATCTAGC	acyl carrier protein	0.387562	1	0.168819	0.121383	0.10195	0.117326	0.161405	0.0887916	green
1348142	-	IP	CCNA_01221	-45	4.92e-05	-	GGACCCCATCTAGC	acyl carrier protein	0.549561	1	0.22705	0.354043	0.227068	0.279636	0.284687	0.192838	green
1085133	-	P	CCNA_01003	-22	0.000627	-	AGCCTCAGCCATAC	flagellar biosynthesis protein FliO	0.00369996	0	0.036065	0.423281	1	0.730921	0.718341	0.133621	red
1084245	-	I	CCNA_01002	-25	4.92e-05	-	GGCGCTGTTCGTGC	flagellar biosyntheis protein FliP	0.0307382	0.0113934	0	0.0940624	1	0.915658	0.55638	0.135089	red
256376	-	P	CCNA_03917	-27	1.14e-05	-	GGCGCCACCCTTGC	NEW	1	0.704112	0.216025	0.0635961	0.00997725	0.003585	0.0151773	0.116154	green
768792	+	P	CCNA_00711	-25	4.92e-05	+	GGCCCGATCGTTGC	hypothetical protein	1	0.356374	0.175928	0.0227355	0	0.011472	0.0304801	0.115767	green
899599	+	P	CCNA_00834	-28	0.00143	+	GGAAAGCTCGTTGC	flagellin	1	0.314255	0.0470888	0.0102345	0.0604475	0.0908892	0.258734	0.199388	green
1026914	+	IP	CCNA_00950	-16	0.000857	+	TGGGTAAATCCTGC	flagellar M-ring protein FliF	0	0	0	0.278732	0.491493	1	0.165951	0.0327913	red
1050202	+	P	CCNA_00972	-27	1.58e-06	+	GGCGCCGGTCTTGC	hypothetical protein	1	0.174096	0.0820486	0.00713312	0	0.00197959	0.00751374	0.118701	green
1085196	+	P	CCNA_01004	-45	0.00289	+	AGGCTTCTTAATGC	flagellar basal-body rod protein FlgB	0	0	0	0.188125	1	0.104417	0.297245	0.076355	red
1232972	+	IP	CCNA_01128	-26	0.000452	+	GGCACAGGGCCTGC	hypothetical protein	1	0.391319	0.0790658	0.0396566	0.0135328	0.00880442	0.0129959	0.045783	green
1233463	+	P	CCNA_01129	-15	0.00307	+	GTCCATCTTCGAGC	flagellar biosynthesis protein FliQ	0.00644509	0	0	0.295841	1	0.558294	0.39313	0.12931	red
1301925	+	P	CCNA_01182	-14	0.000857	+	CGCGAAAAACAAGC	glutathione S-transferase	0.389183	0.19648	0.355247	0.639748	1	0.56018	0.421177	0.570796	red
1301937	+	P	CCNA_01182	-26	0.000857	+	CGCGAAAAACAAGC	glutathione S-transferase	1	0.553128	0.162874	0.887718	0.688356	0.683158	0.986717	0.96375	green
1634129	+	P	CCNA_01525	-23	0.00143	+	GGCGCTATGCTTAA	flagellar biosynthesis repressor flbT	0.00376977	0.0314392	0.192914	0.331437	1	0.824501	0.273408	0.0810369	red
1634209	+	P	CCNA_01525	-19	0.00213	+	TTCGCCTAGCTTGC	flagellar biosynthesis repressor flbT	0.551174	0.199399	0.0334165	0.076846	0.347599	1	0.851912	0.611624	red
1636299	+	P	CCNA_01528	-27	0.000289	+	GGCCCGGCAATTGC	flagellin fljK	0.579909	0.335248	0	0	0	0.588918	1	0.362647	red
2343102	+	P	CCNA_02191	-26	9.74e-05	+	GGCGCCGACTTTGC	hypothetical protein	1	0.951796	0.529688	0.227494	0.12126	0.0697498	0.0663308	0.121918	green
2445745	+	AP	CCNA_02299	-33	0.00116	+	GGCGCACTCCGGGC	cell division ATP-binding protein ftsE	0.353359	1	0.642943	0.748607	0.43625	0.379498	0.415304	0.17015	green
2475498	+	P	CCNA_02334	-26	6.11e-06	+	GGCACGCGACTTGC	transcriptional regulator of stalk biogenesis staR	1	0.314516	0.160799	0.0267692	0.0151349	0.00946092	0.0180754	0.0503316	green
3266255	+	P	CCNA_03117	-26	4.68e-07	+	GGCCCCGATCTTGC	cytosolic protein	1	0.202929	0.15942	0.0530344	0.0233881	0.0102046	0.0394773	0.150389	green
3282792	+	P	CCNA_03135	-18	0.00143	+	TGGCCGAGTCTGGC	flagellum-specific ATP synthase fliL	0.00647943	0.00135094	0.0210526	0.21048	0.69319	1	0.554277	0.232142	red
3572626	+	P	CCNA_03404	-26	0.000133	+	GGCACGGGCGTTGC	regulator of CtrA degradation rcdA	1	0.426875	0.143866	0.0348111	0.010917	0.0148759	0.0230395	0.0640177	green
